# Supplementary material for: LncRNA ENST869 Targeting Nestin Transcriptional Region to Affect the Pharmacological Effects of Chidamide in Breast Cancer Cells
Source: Frontiers journal article supplement (doi:10.3389/fonc.2022.874343), 2022-04-04

# Nestin Promoter Fragment Cloning for Luciferase Assay

## 1. Fragment PCR Amplification from Genomic DNA

(Primers containing PmeI and NotI enzyme site)

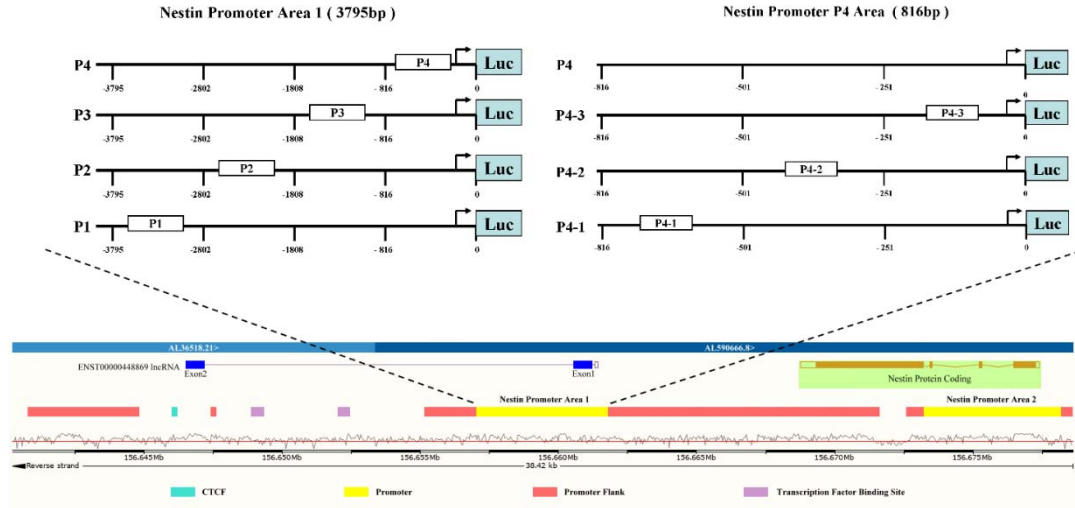

P1 P2 P3

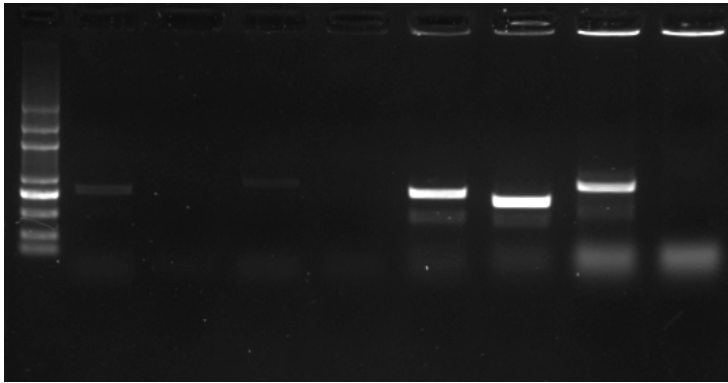

P4

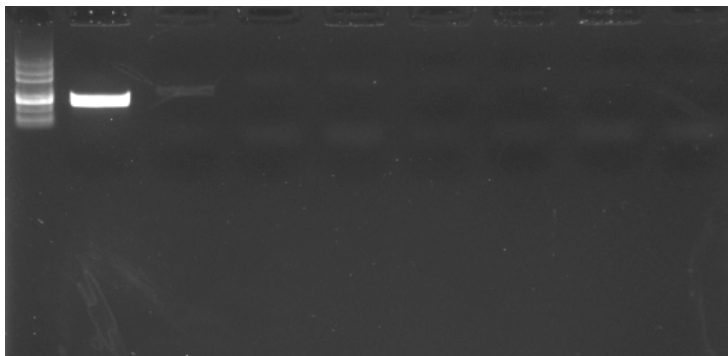

P4-1

P4-2

P4-3

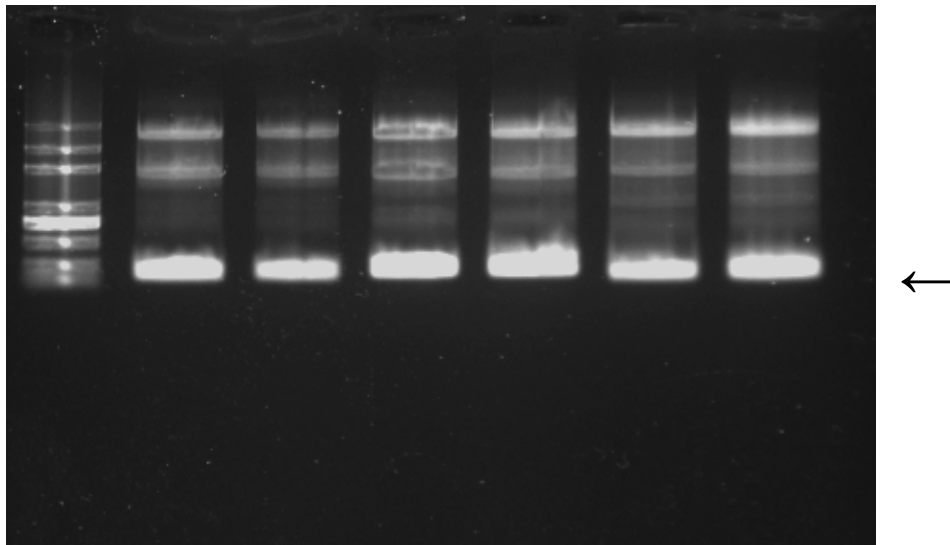

## 2. Cloning PCR for Screening sense colony.

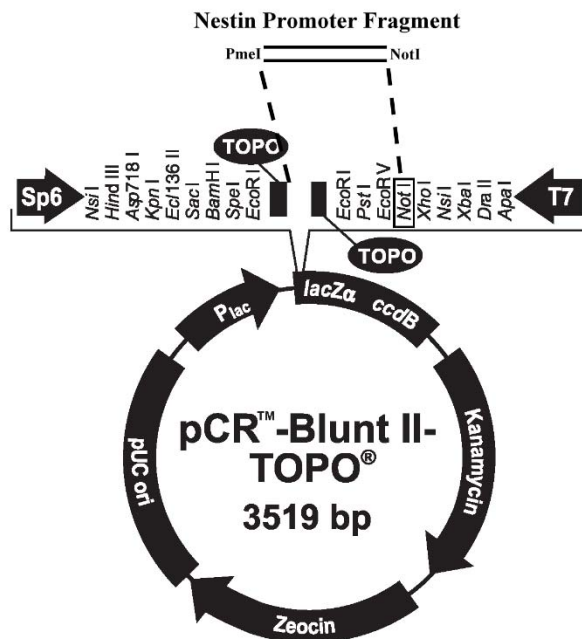

P4-1-TOPO p4-2-TOPO p4-3-TOPO

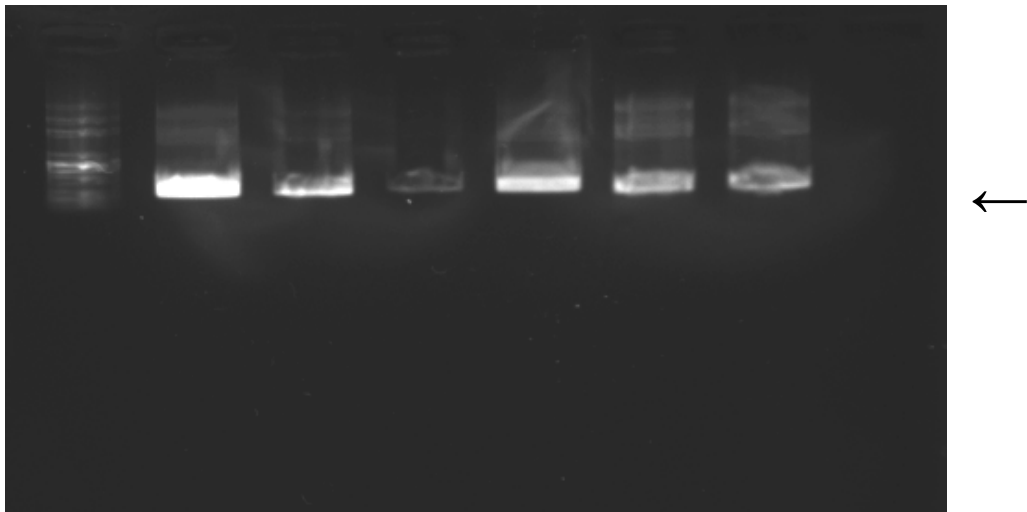

P1-TOPO P2-TOPO P3-TOPO P4-TOPO

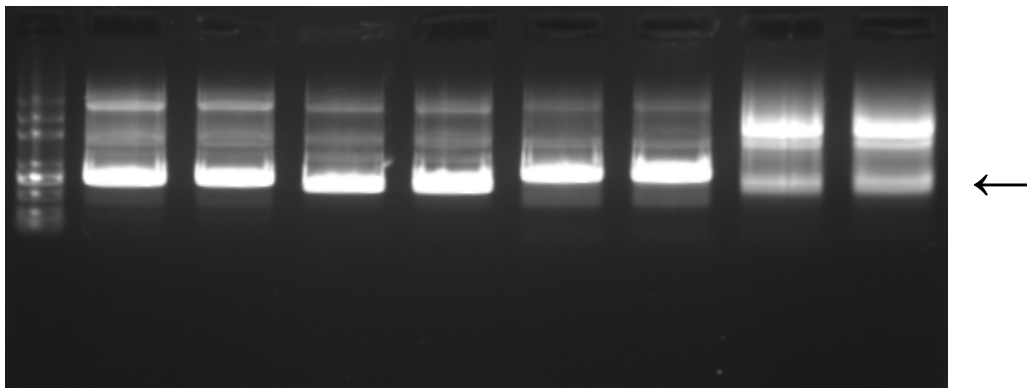

### 3. PmlI and NotI enzyme cite the plasmids

P1 P2 P3 P4 P4-1 P4-2 P4-3 psiCHECK

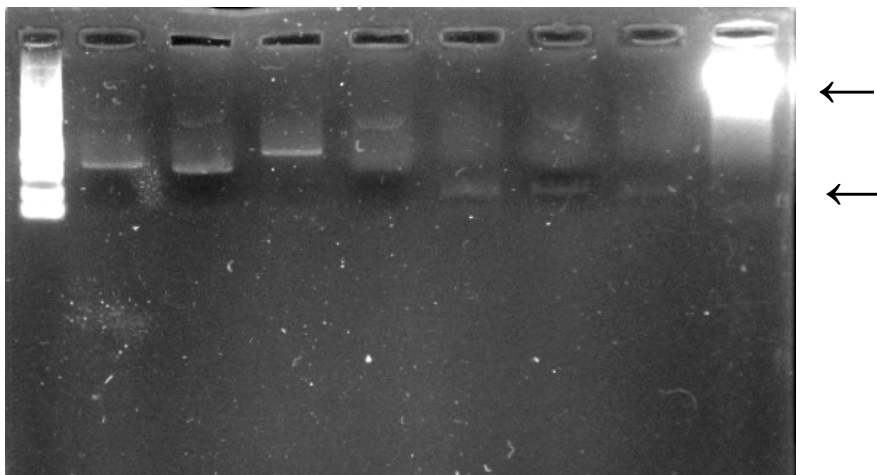

**4. Ligation Nestin promoter fragments with psiCHECK fragment, after transformation, make colony PCR to verify the positive plasmid.**

**P1**

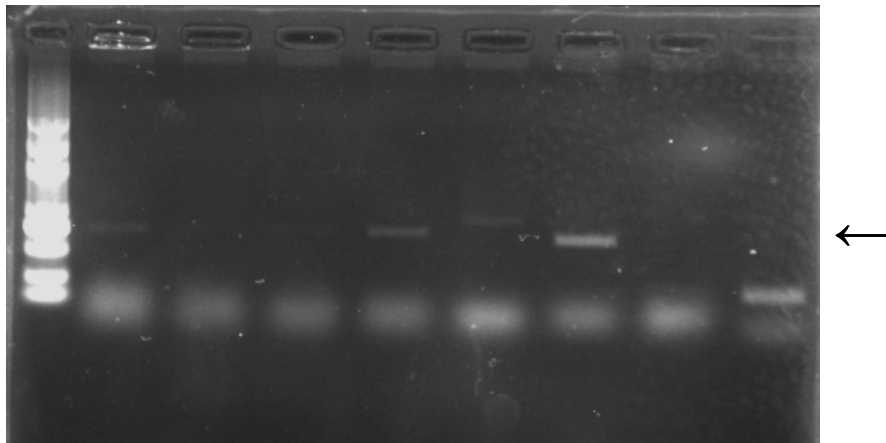

**P2**

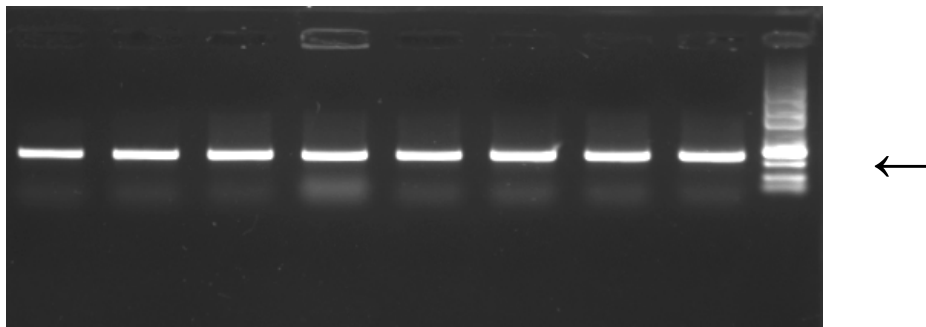

**P3**

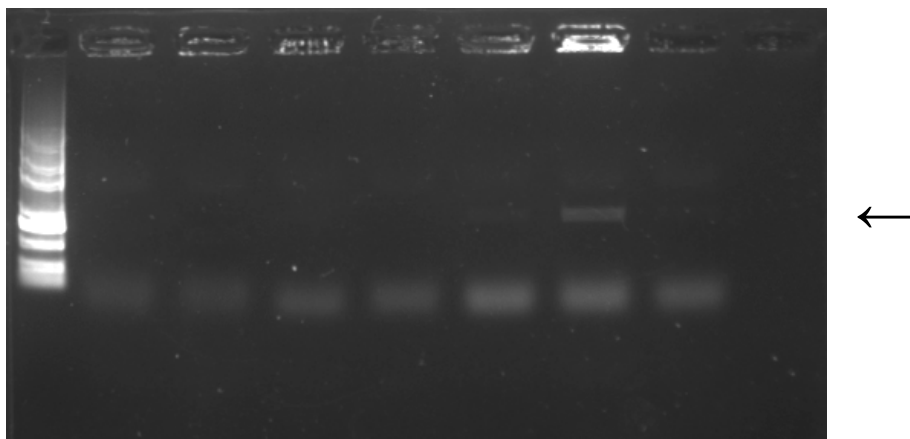

**P4**

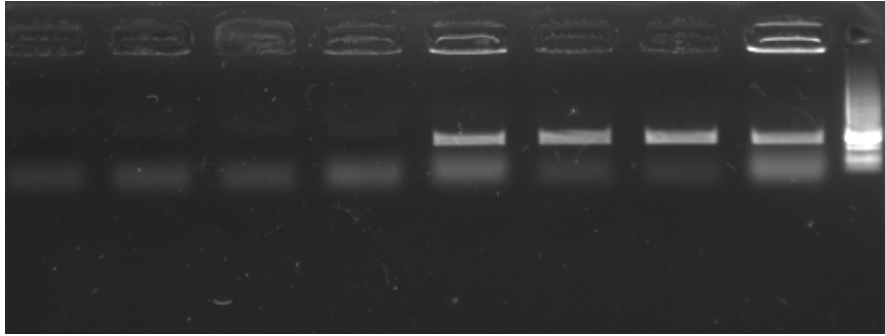

**P4-1**

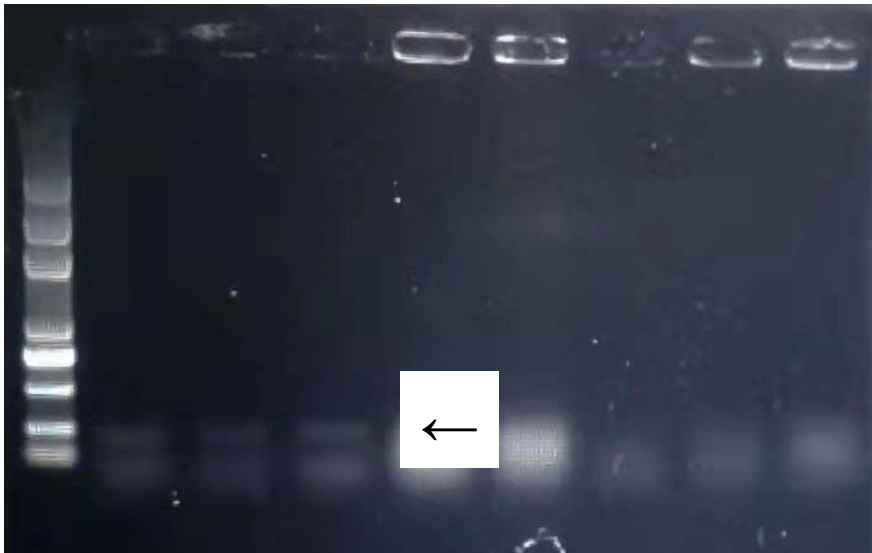

**P4-2**

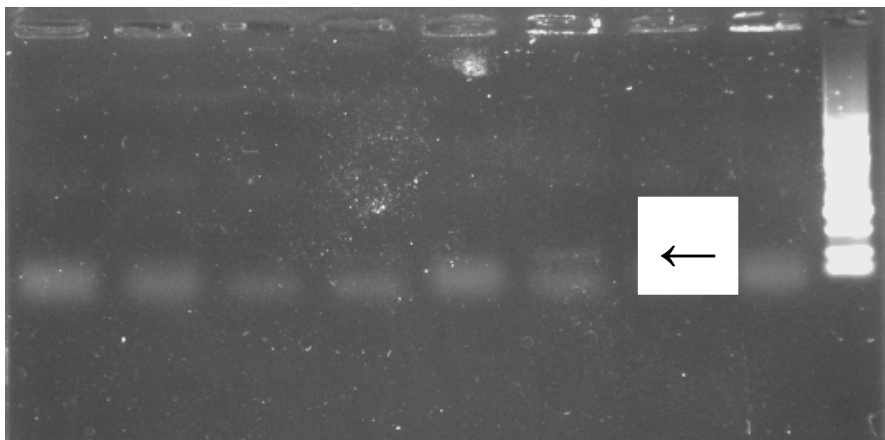

P4-3

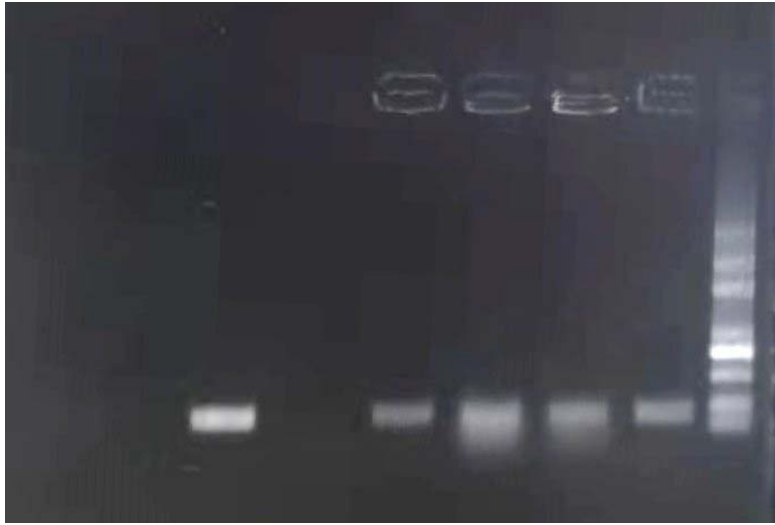

Supplement: Data_Sheet_1.PDF [file Data_Sheet_1.PDF]
